# Supplementary material for: Analysis of circulating tumor DNA during checkpoint inhibition in metastatic melanoma using a tumor-agnostic panel
Source: PubMed Central journal article supplement (PMC10470440; doi:10.1097/cmr.0000000000000903), 2023-06-12
Supplement: mr-33-364-s004.pdf [file mr-33-364-s004.pdf]

# Supplementary Figure 3

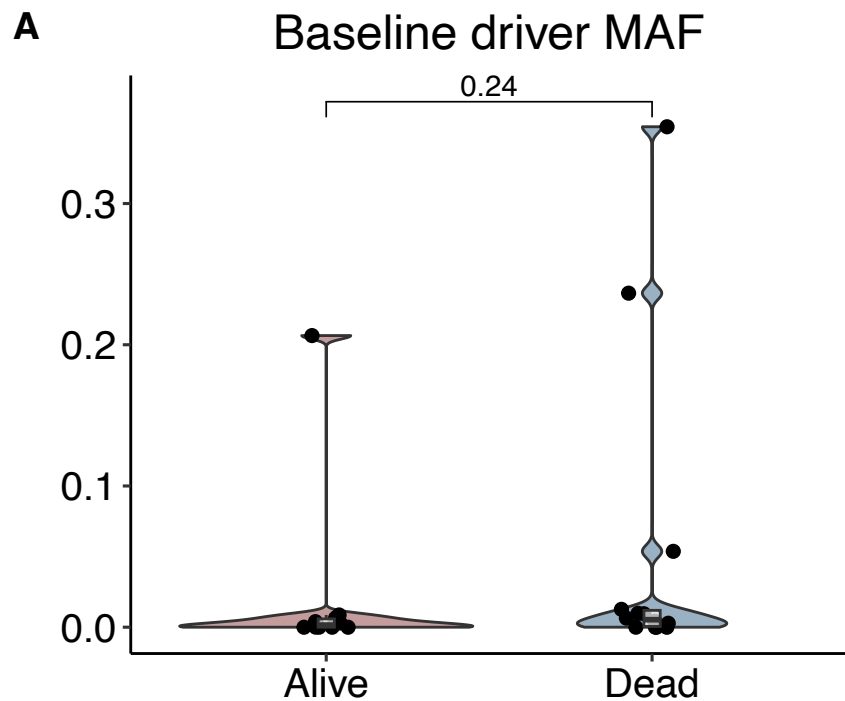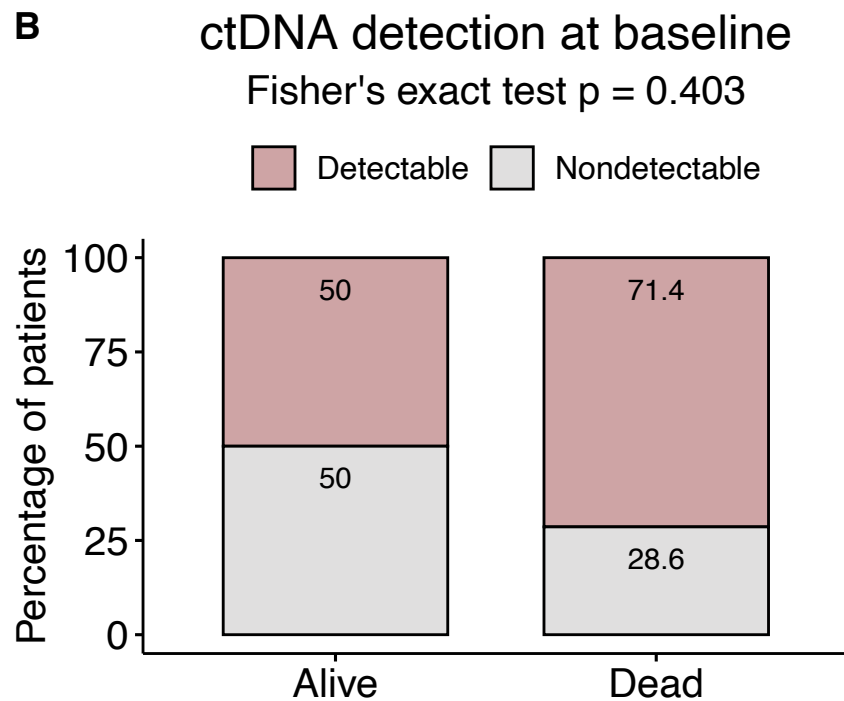

**C** Number of patients carrying a mutation in driver genes

|      |      |      |     |       |        |      |       |      |       |        |     |      |      |       |      |      |      |        |     |      |       |
|------|------|------|-----|-------|--------|------|-------|------|-------|--------|-----|------|------|-------|------|------|------|--------|-----|------|-------|
| 2    | 0    | 2    | 0   | 1     | 1      | 2    | 1     | 0    | 1     | 0      | 0   | 0    | 0    | 1     | 0    | 0    | 0    | 0      | 1   | 1    | Alive |
| 4    | 3    | 3    | 2   | 2     | 2      | 2    | 2     | 1    | 1     | 1      | 1   | 1    | 1    | 1     | 1    | 1    | 1    | 1      | 0   | 0    | Dead  |
| TERT | MTOR | BRAF | NF1 | SETD2 | ARID1B | ATRX | DDX3X | TP53 | PBRM1 | PIK3CA | MET | EZH2 | JAK2 | ARID2 | IDH1 | RAC1 | PTEN | CTNNB1 | KIT | JAK1 |       |
