# Supplementary material for: Analysis of circulating tumor DNA during checkpoint inhibition in metastatic melanoma using a tumor-agnostic panel
Source: PubMed Central journal article supplement (PMC10470440; doi:10.1097/cmr.0000000000000903), 2023-06-12

Supplementary Figure 4

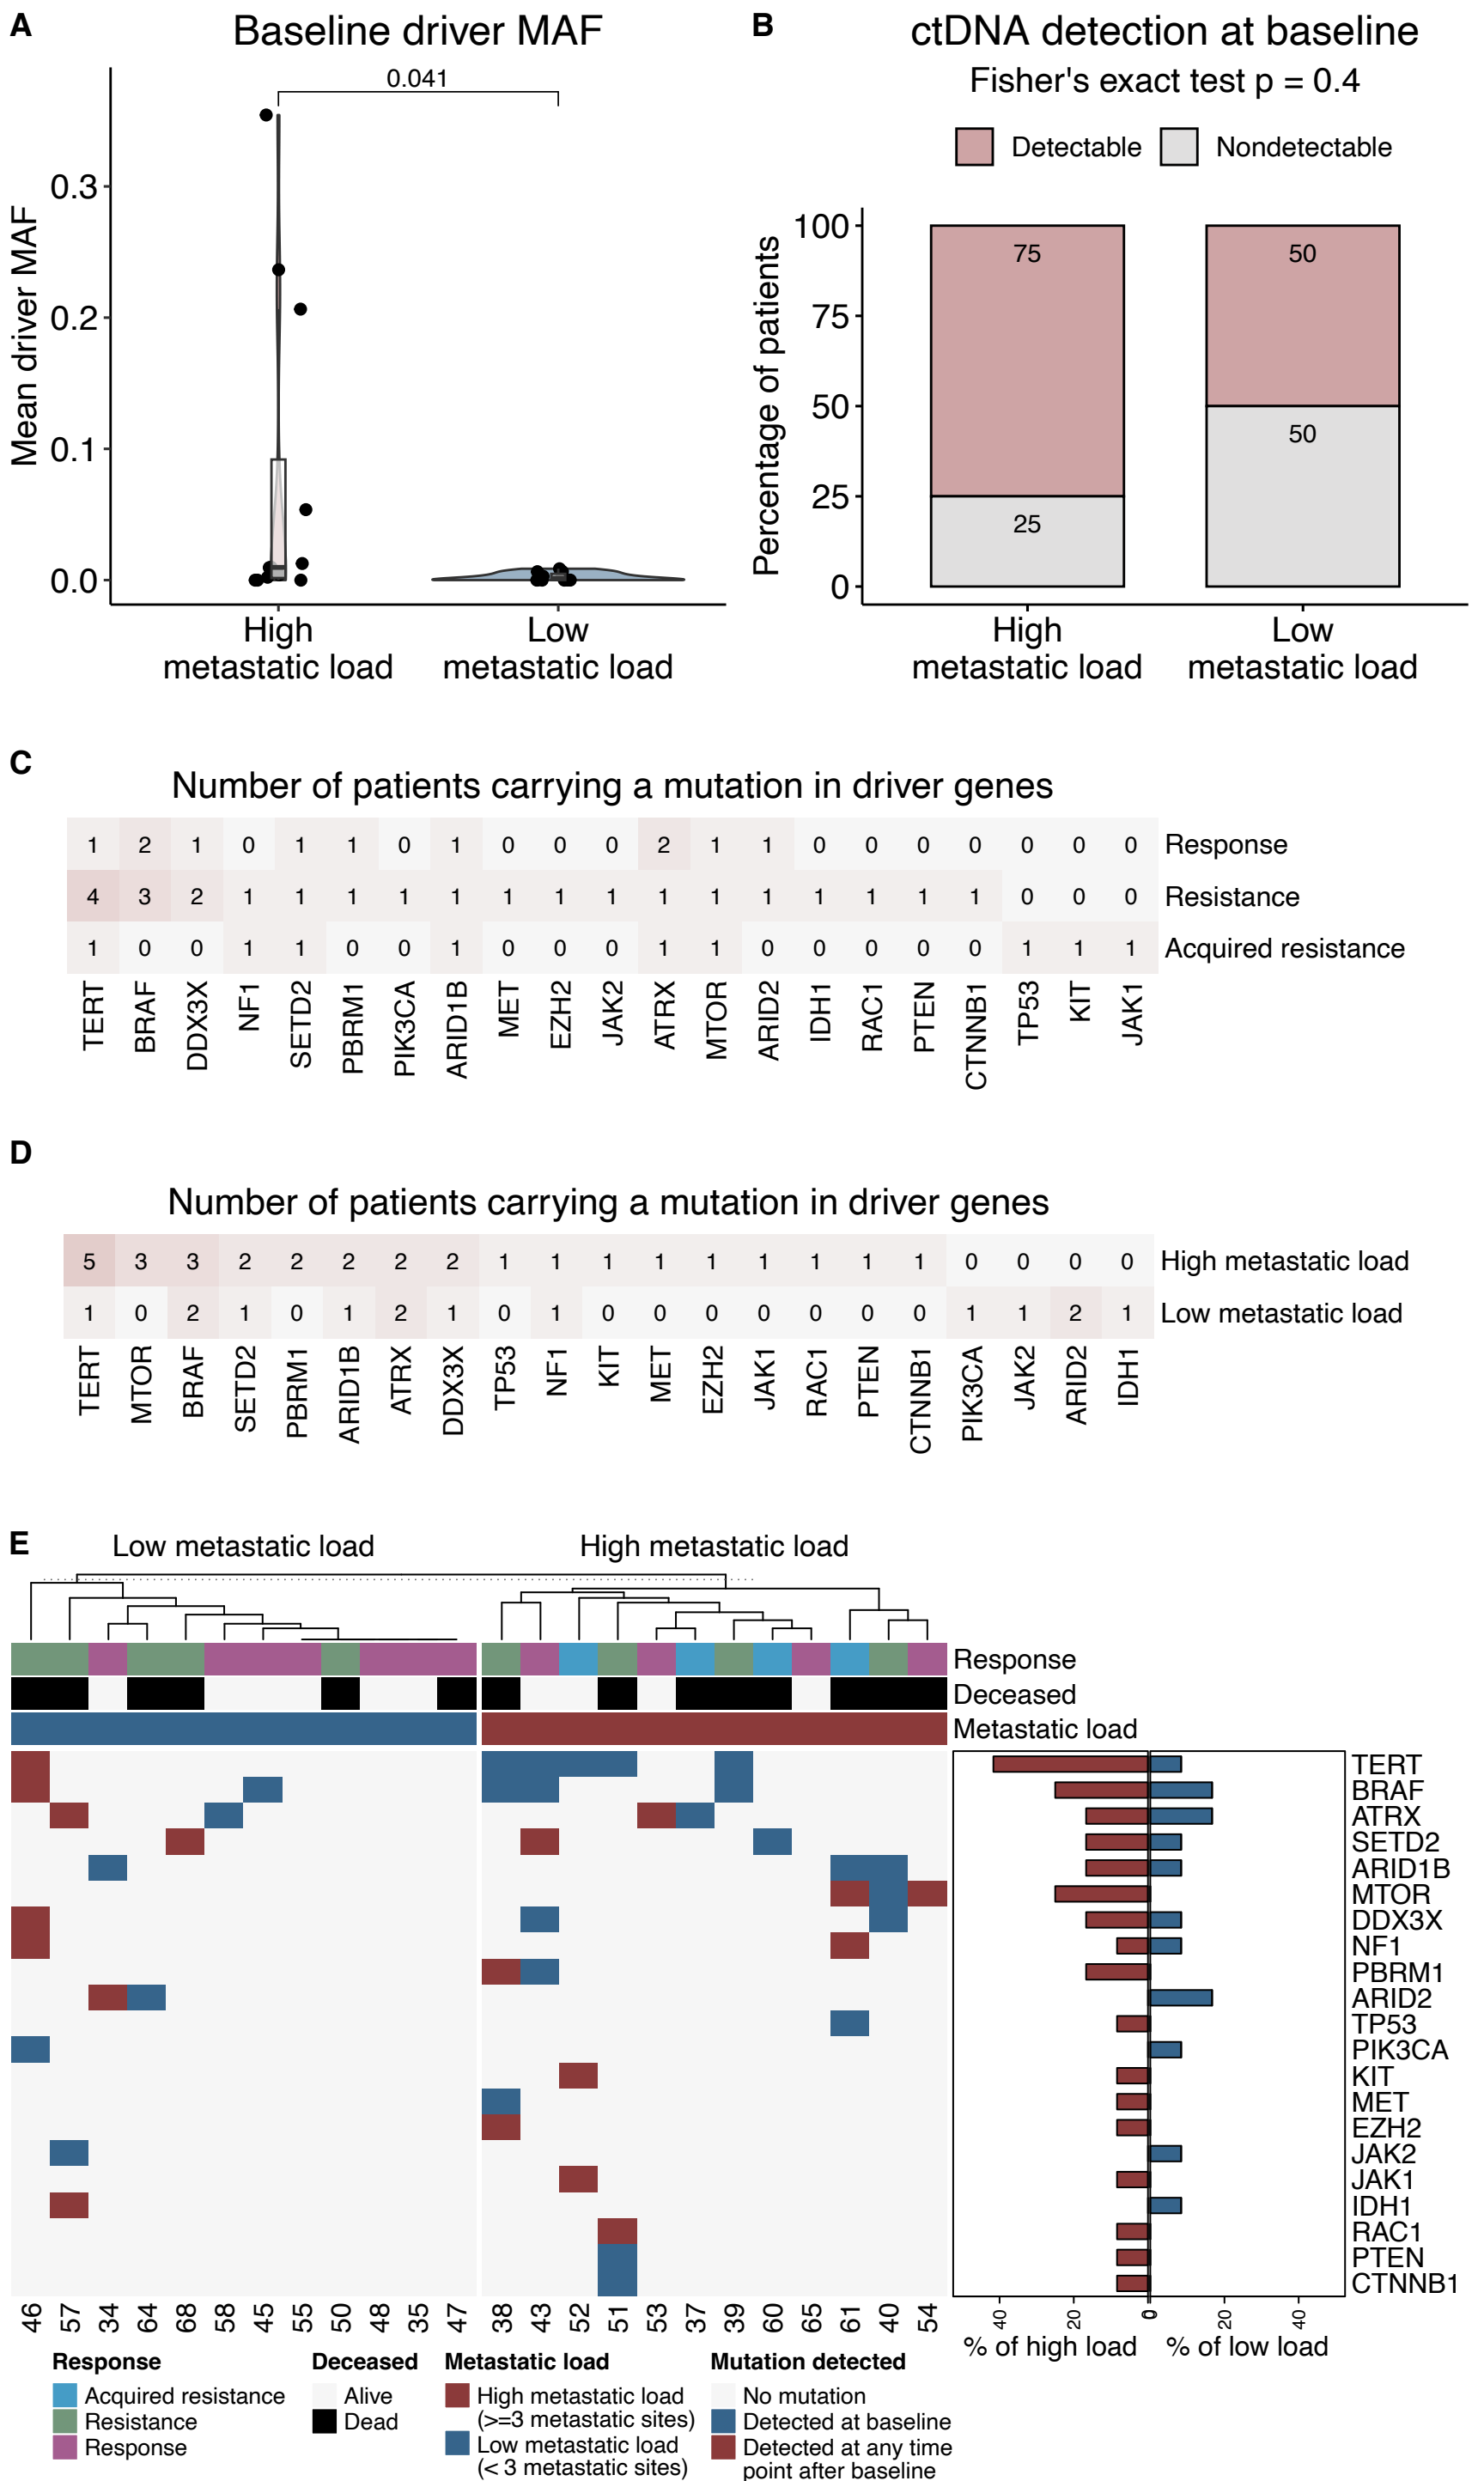

Supplement: mr-33-364-s005.pdf [file mr-33-364-s005.pdf]
