# Supplementary material for: Analysis of circulating tumor DNA during checkpoint inhibition in metastatic melanoma using a tumor-agnostic panel
Source: PubMed Central journal article supplement (PMC10470440; doi:10.1097/cmr.0000000000000903), 2023-06-12

# Supplementary Figure 5

Strata  Low metastatic load  High Metastatic load

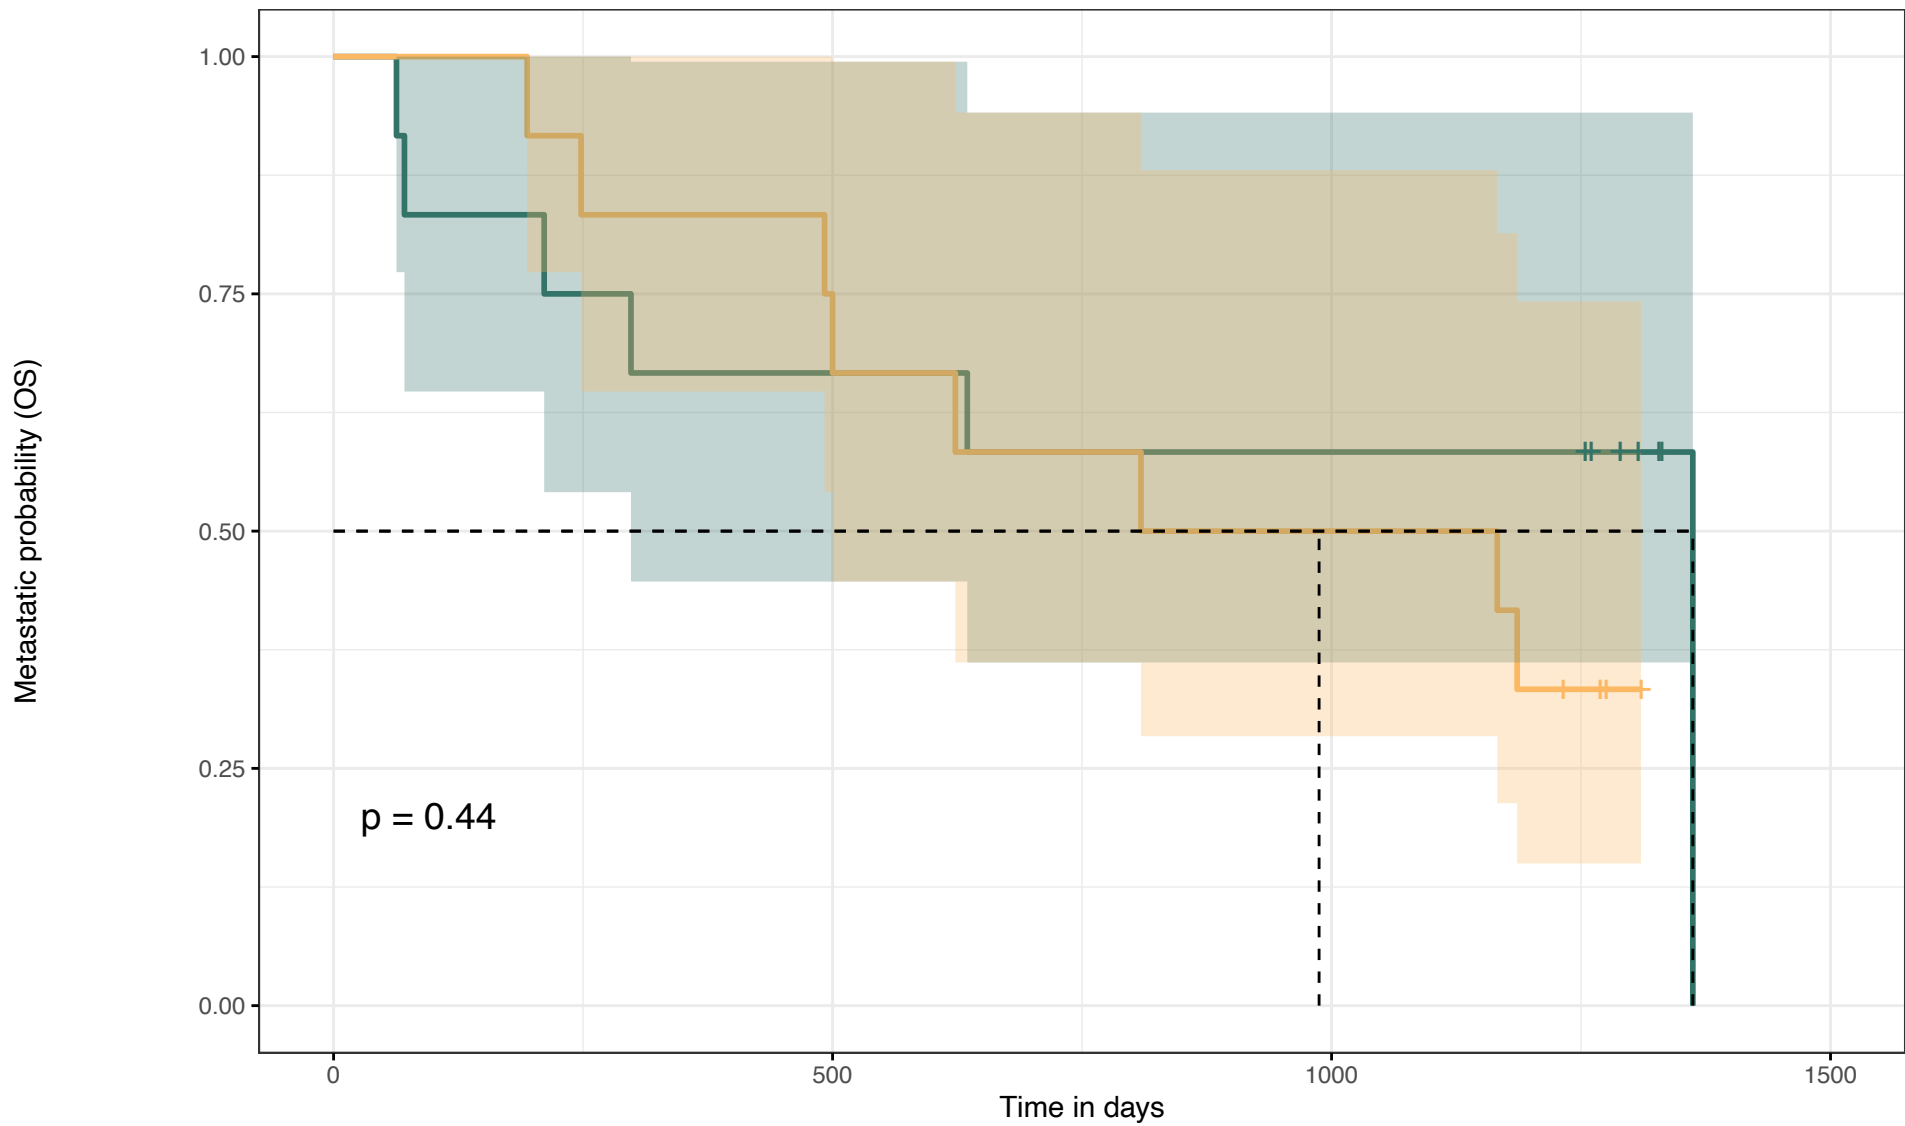

## Number at risk

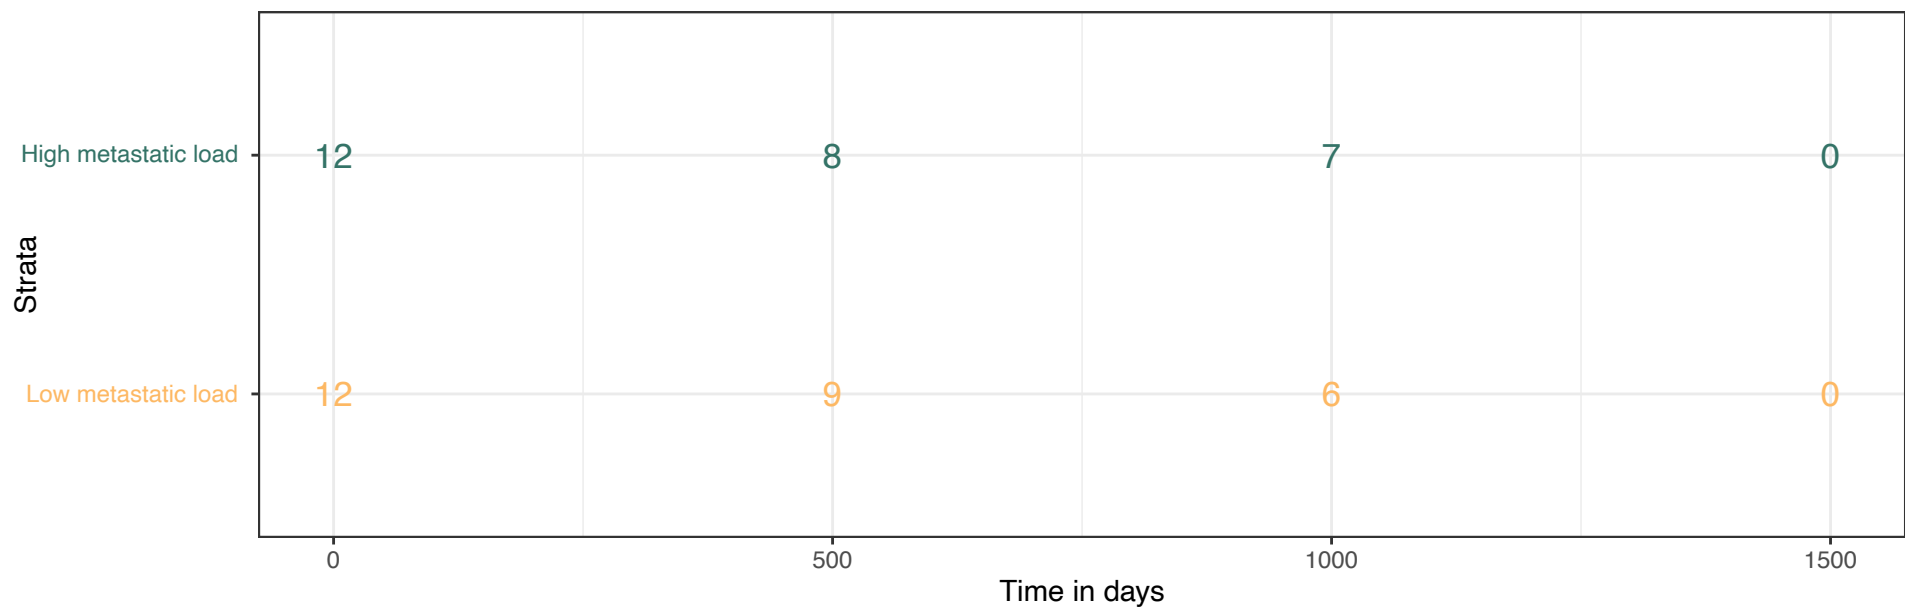

Supplement: mr-33-364-s006.pdf [file mr-33-364-s006.pdf]
